1 **TITLE**

2 Sentinel Case of *Candida auris* in the Western United States Following Prolonged  
3 Occult Colonization in a Returned Traveler from India

4

5 **AUTHORS AND AFFILIATIONS**

6 Michael H. Woodworth\*<sup>1</sup>, David Dynerman<sup>2\*</sup>, Emily D. Crawford<sup>2</sup>, Lucy M. Li<sup>2</sup>, Sarah B.  
7 Doernberg<sup>3</sup>, Lynn Ramirez-Avila<sup>4</sup>, Paula Hayakawa Serpa<sup>2,3</sup>, Amy Nichols<sup>5</sup>, Amy Lyden<sup>2</sup>,  
8 Cristina M. Tato<sup>2</sup>, Steve Miller<sup>6</sup>, Joseph L. Derisi<sup>2,7</sup>, Charles Langelier<sup>2,3</sup>.

9 \*equal contributions

10

11 <sup>1</sup>Division of Infectious Diseases, Department of Medicine, Emory University School of  
12 Medicine, Atlanta, GA, USA

13 <sup>2</sup>Chan Zuckerberg Biohub, San Francisco CA

14 <sup>3</sup>Division of Infectious Diseases, Department of Medicine, University of California, San  
15 Francisco, CA, USA

16 <sup>4</sup>Department of Pediatrics, Division of Pediatric Infectious Diseases and Global Health,  
17 University of California, San Francisco, CA, USA

18 <sup>5</sup>Hospital Epidemiology and Infection Control, University of California, San Francisco, CA,  
19 USA

20 <sup>6</sup>Department of Laboratory Medicine, University of California, San Francisco, San  
21 Francisco, CA, USA

22 <sup>7</sup>Department of Biochemistry and Biophysics, University of California, San Francisco, San  
23 Francisco, CA, USA

24 **KEYWORDS**

25 *Candida auris*, emerging infection, antimicrobial resistance, echinocandin resistance,

26 metagenomic

27

28 **RUNNING TITLE**

29 Emergence of *Candida auris* in Western USA

30 **FOOTNOTE PAGE**

31 **Conflict of interest statement:** The authors do not have a commercial or other  
32 association that might pose a conflict of interest

33

34 **FUNDING**

35 NCATS TL1 TR002382, NIAID UM1AI104681(Woodworth M).

36 NHLBI K12HL119997, Nina Ireland Foundation, Marcus Foundation (Langelier C)

37 NIAID P01AI091575 and the Chan Zuckerberg Biohub (Crawford ED and DeRisi JL)

38

39 **PRIOR PRESENTATION:** This work has not been previously presented at any meetings.

40

41 **CORRESPONDING AUTHOR CONTACT INFORMATION**

42 Charles Langelier, MD, PhD

43 Division of Infectious Diseases, Department of Medicine

44 1700 4th St, Room 403 San Francisco CA, 94158

45 chaz.langelier@ucsf.edu

46 **ABSTRACT**

47 *Candida auris* is an emerging multidrug-resistant yeast with high mortality. We  
48 report the sentinel *C. auris* case on the United States West Coast in a patient who  
49 relocated from India. We identified close phylogenetic relatedness to the South Asia  
50 clade and *ERG11* Y132F and *FKS1* S639Y mutations potentially explaining antifungal  
51 resistance.

52

53

## 54 **Introduction**

55 *Candida auris* is an emerging fungal pathogen with high minimum inhibitory  
56 concentrations (MIC) for many antifungals. Since identification in 2009, it is increasingly  
57 recognized as an important cause of invasive disease and nosocomial outbreaks, with  
58 high associated in-hospital mortality of 40-72%(1). Genomic evaluation of strains from  
59 multiple geographic regions suggests simultaneous emergence of distinct geographic  
60 clades on three continents, as opposed to dissemination from a single source (1). This  
61 observation suggests environmental factors such as increased antifungal use may have  
62 contributed to *C. auris* emergence(1).

63 In addition to high fluconazole MICs, *C. auris* isolates also frequently have high  
64 MICs for other antifungals including amphotericin and less frequently echinocandins(1).  
65 Despite the alarming frequency of elevated antifungal MICs in *C. auris*, the underlying  
66 mechanisms and alleles associated with this resistance have not been fully  
67 characterized. In *C. auris* as well as in other *Candida* species, mutations in *ERG11*  
68 (ergosterol synthetase), *FKS1* (1,3 beta-D-glucan synthetase) and *FUR1* (uracil  
69 phosphoribosyltransferase) have been associated with resistance to fluconazole,  
70 echinocandins and flucytosine, respectively(1, 2). Previous studies suggest that  
71 mutations in these genes can arise in the setting of systemic antifungal therapy(3).

72 Despite first appearing in the eastern United States in 2013, *C. auris* had not  
73 been detected on the US West Coast(2). Here we report the identification of *C. auris* in  
74 this region, which was unusual in that it did not establish endemicity, and use whole  
75 genome sequencing (WGS) to identify strain origin and evaluate genetic mechanisms of  
76 antifungal resistance.

77

## 78 **Methods**

### 79 *Case description*

80           An elderly man with metastatic rectal cancer relocated from India to California.  
81 He had received chemotherapy and radiation while in India and had also undergone  
82 intraabdominal surgeries complicated by sepsis. In the year following his move, he  
83 required multiple admissions to the University of California, San Francisco Medical  
84 Center (UCSF) for management of his malignancy and for secondary infections with  
85 carbapenem-resistant *Enterobacteriaceae* (CRE), for which he was placed in contact  
86 isolation. During his initial multi-month admission, two cultures from his urostomy grew  
87 10,000 colony forming units of a non-*Candida albicans* yeast that was not further  
88 speciated due to unclear clinical significance. In the course of his care, he was treated  
89 with echinocandins with prophylactic intent. Several months after initial admission, he  
90 was transitioned to palliative care. Three days prior to death, a nephrostomy culture  
91 returned positive for yeast, which was ultimately speciated as *Candida auris*.

92

### 93 *Clinical microbiology and antifungal susceptibility testing*

94           Urine collected from the patient's nephrostomy tube into a sterile container  
95 underwent quantitative culture for bacteria and yeast using standard culture methods.  
96 Species identification was made using MALDI-TOF mass spectrometry (Brucker  
97 Diagnostics), which returned a score value of 2.14, and was additionally confirmed by  
98 the California Department of Public Health. Antifungal susceptibility testing was  
99 performed using Sensititre YeastOne MIC plates (Trek Diagnostic Systems, Inc.), which

100 has >95% agreement with the Clinical Laboratory Standards Institute reference  
101 method.(4)

102

### 103 *Whole genome sequencing*

104 DNA was extracted from the cultured *C. auris* isolate using the Zymo ZR  
105 Bacterial/Fungal DNA kit. Library preparation was completed with the New England  
106 Biolabs NEBNext Ultra II DNA library prep kit and WGS was performed using an  
107 Illumina NextSeq. The same DNA also underwent library prep using the Oxford  
108 Nanopore Rapid Low Input by PCR Barcoding Kit and WGS on a MinION instrument.

109

### 110 *Genome assembly, phylogenetic analyses and antifungal resistance gene analysis*

111 Raw Illumina sequencing reads were quality filtered using PriceSeqFilter(5) and  
112 then parsed with Nanopore reads for hybrid *de novo* assembly using DBG2OLC (6).  
113 Reference-based whole genome phylogenetic analysis constructed from core genome  
114 single nucleotide polymorphisms (SNPs) was carried out with the NASP pipeline(7)  
115 using Pakistan strain B8441 as the reference genome and incorporating genomes from  
116 Lockhart et al.(1) as well as *C. auris* isolate 16B15b containing the *FKS1* S639P  
117 mutation identified by Rhodes et al (3). RAxML-ng (8) was used to build maximum  
118 likelihood phylogenetic trees as detailed in Supplemental Methods. To identify genetic  
119 mutations associated with fluconazole or echinocandin resistance, Illumina sequences  
120 were aligned against *ERG11* (Genbank KY410388.1) and *FKS1* (Genbank  
121 XM\_018312471.1) using BowTie2(9). Mutations were confirmed by *ERG11* and *FKS1*

122 PCR followed by Sanger Sequencing (Table S1) following previously described  
123 methods.(10)

124

## 125 **Results**

### 126 *Assembly and Phylogenetic Characteristics*

127 *De novo* hybrid assembly of Illumina and Oxford Nanopore reads produced a  
128 total of 33 contigs spanning 12 Megabases (Mb), characterized by 44.9% GC content,  
129 consistent with prior estimates(1, 3). Whole genome phylogenetic analysis based on a  
130 core genome of 208,384 SNPs placed this isolate within the South Asia clade (Figure  
131 A). On average, 56 SNPs separated this isolate from others from the South Asia clade  
132 (Figure B).

133

### 134 *Phenotypic and Genotypic Assessment of Antifungal Resistance*

135 The California isolate demonstrated low MICs to amphotericin (1 µg/mL),  
136 flucytosine (0.5 µg/mL), and voriconazole (0.032 µg/mL). The isolate had an elevated  
137 fluconazole MIC of 32 µg/mL. Assessment of this isolate's *ERG11* (encoding ergosterol  
138 synthetase) allele revealed the well-characterized Y132F substitution in the azole  
139 resistance hotspot region (1, 3). Unlike most *C. auris* strains, this California isolate also  
140 exhibited a high caspofungin MIC of 8 µg/mL. Interrogation of *FKS1* (encoding (1,3)-β-  
141 D-glucan synthetase) revealed a S639Y mutation in the echinocandin resistance  
142 hotspot 1 region (Table S1) (3, 10).

143

## 144 **Discussion**



145 *C. auris* emerges on the West Coast of the United States

146           Here we report the first case of *C. auris* on the US West Coast, a region that had  
147 no previous reports of the pathogen despite emergence in New York in 2013. The  
148 patient's history of healthcare exposure in India combined with the clustering of his *C.*  
149 *auris* isolate with the South Asia clade by WGS phylogenetic analysis suggests that he  
150 acquired *C. auris* abroad prior to hospitalization in California. This finding supports  
151 current guidance from the US Centers for Disease Control and Prevention to speciate  
152 all *Candida* in high risk patients including those from regions of high *C. auris*  
153 prevalence, to allow for early implementation of infection control measures(1, 11).  
154 Following identification of *C. auris*, enhanced infection control measures were  
155 implemented at UCSF including surface disinfection, a unit-level point prevalence  
156 survey and prospective surveillance. No additional cases of *C. auris* at our medical  
157 center have been identified in over a year. This case represents an unusual interruption  
158 in spread and prolonged healthcare environmental contamination that has been  
159 characteristic of detection of healthcare-associated *C. auris*. Early implementation of  
160 contact precautions for CRE may have contributed to curbing transmission of *C. auris* in  
161 this case.

162           This isolate had a high fluconazole MIC with an observed *ERG11* Y132F  
163 mutation (1, 3). The California *C. auris* isolate also demonstrated a high echinocandin  
164 MIC, which is observed in less than 10% of *C. auris* strains (1). It is possible that this  
165 patient's prophylactic treatment with echinocandins could have selected for resistance  
166 as observed in this isolate. This *C. auris* isolate also had a *FKS1* hotspot-1 region  
167 mutation, which has been associated with echinocandin resistance in multiple other

168 *Candida* species (3, 10). The identified *FKS1* S639 substitutions of nonpolar residues  
169 (Y,F,P) has also been identified in other *C. auris* strains with high echinocandin MIC  
170 values, suggesting a key role for this amino acid in echinocandin resistance (3, 10).

171 Further study is needed to estimate the prevalence and duration of colonization  
172 by this emerging pathogen. Future work using WGS is needed to clarify the origins of *C.*  
173 *auris*, transmission patterns, and mechanisms of resistance to prevent and manage this  
174 emerging fungal pathogen of global significance.

175

## 176 **FUNDING**

177 This work was supported by the National Center for Advancing Translational Sciences  
178 [grant number TL1 TR002382 to MHW], the National Institute for Allergy and Infectious  
179 Disease [UM1AI104681 to MHW, P01AI091575 to CL], the National Heart, Lung, and  
180 Blood Institute [NHLBI K23HL138461-01A1 to CL], and the Chan Zuckerberg Biohub  
181 [JLD]. The content is solely the responsibility of the authors and does not necessarily  
182 represent the official views of the National Institutes of Health.

183

## 184 **DATA AVAILABILITY**

185 Raw sequences are available via Bioproject ID PRJNA480539.

186 REFERENCES

- 187 1. **Lockhart SR, Etienne KA, Vallabhaneni S, Farooqi J, Chowdhary A,**  
188 **Govender NP, Colombo AL, Calvo B, Cuomo CA, Desjardins CA, Berkow EL,**  
189 **Castanheira M, Magobo RE, Jabeen K, Asghar RJ, Meis JF, Jackson B,**  
190 **Chiller T, Litvintseva AP.** 2017. Simultaneous Emergence of Multidrug-Resistant  
191 *Candida auris* on 3 Continents Confirmed by Whole-Genome Sequencing and  
192 Epidemiological Analyses **64**.
- 193 2. **Vallabhaneni S, Kallen A, Tsay S, Chow N, Welsh R, Kerins J, Kemble SK,**  
194 **Pacilli M, Black SR, Landon E, Ridgway J, Palmore TN, Zelzany A, Adams**  
195 **EH, Quinn M, Chaturvedi S, Greenko J, Fernandez R, Southwick K, Furuya**  
196 **EY, Calfee DP, Hamula C, Patel G, Barrett P, Lafaro P, Berkow EL, Moulton-**  
197 **Meissner H, Noble-Wang J, Fagan RP, Jackson BR, Lockhart SR, Litvintseva**  
198 **AP, Chiller TM.** 2016. Investigation of the First Seven Reported Cases of  
199 *Candida auris*, a Globally Emerging Invasive, Multidrug-Resistant Fungus —  
200 United States, May 2013–August 2016. *MMWR Morb Mortal Wkly Rep* **65**:1234–  
201 1237.
- 202 3. **Rhodes J, Abdolrasouli A, Farrer RA, Cuomo CA, Aanensen DM, Armstrong-**  
203 **James D, Fisher MC, Schelenz S.** 2018. Genomic epidemiology of the UK  
204 outbreak of the emerging human fungal pathogen *Candida auris*. *Emerg Microbes*  
205 *Infect* **7**.
- 206 4. **Cuenca-Estrella M, Gomez-Lopez A, Alastruey-Izquierdo A, Bernal-Martinez**  
207 **L, Cuesta I, Buitrago MJ, Rodriguez-Tudela JL.** 2010. Comparison of the Vitek  
208 2 antifungal susceptibility system with the Clinical and Laboratory Standards  
209 Institute (CLSI) and European Committee on Antimicrobial Susceptibility Testing  
210 (EUCAST) broth microdilution reference methods and with the Sensititre Ye. *J*  
211 *Clin Microbiol* **48**:1782–1786.
- 212 5. **Ruby JG, Bellare P, Derisi JL.** 2013. PRICE: software for the targeted assembly  
213 of components of (Meta) genomic sequence data. *G3 (Bethesda)* **3**:865–880.
- 214 6. **Ye C, Hill CM, Wu S, Ruan J, Ma ZS.** 2016. DBG2OLC: Efficient Assembly of  
215 Large Genomes Using Long Erroneous Reads of the Third Generation  
216 Sequencing Technologies. *Sci Rep* **6**:31900.
- 217 7. **Roe C, Smith DE, Williamson CHD, Aziz M, Keim P, Hepp CM, Driebe EM,**  
218 **Lemmer D, Travis J, Hicks ND, Schupp JM, Wagner DM, Engelthaler DM,**  
219 **Gillece JD, Sahl JW, Drees KP.** 2016. NASP: an accurate, rapid method for the  
220 identification of SNPs in WGS datasets that supports flexible input and output  
221 formats. *Microb Genomics* **2**.
- 222 8. **Alexey Kozlov.** 2018. amkozlov/raxml-ng: RAXML-NG v0.6.0 BETA. Zenodo.
- 223 9. **Langmead B, Salzberg SL.** 2012. Fast gapped-read alignment with Bowtie 2.  
224 *Nat Methods* **9**:357–359.
- 225 10. **Chowdhary A, Prakash A, Sharma C, Kordalewska M, Kumar A, Sarma S,**  
226 **Tarai B, Singh A, Upadhyaya G, Upadhyay S, Yadav P, Singh PK, Khillan V,**  
227 **Sachdeva N, Perlin DS, Meis JF.** 2018. A multicentre study of antifungal  
228 susceptibility patterns among 350 *Candida auris* isolates (2009-17) in India: role  
229 of the ERG11 and FKS1 genes in azole and echinocandin resistance. *J*  
230 *Antimicrob Chemother.*

- 231 11. **Chowdhary A, Sharma C, Meis JF.** 2017. Candida auris: A rapidly emerging  
232 cause of hospital-acquired multidrug-resistant fungal infections globally. PLoS  
233 Pathog **13**:1–10.  
234

# A

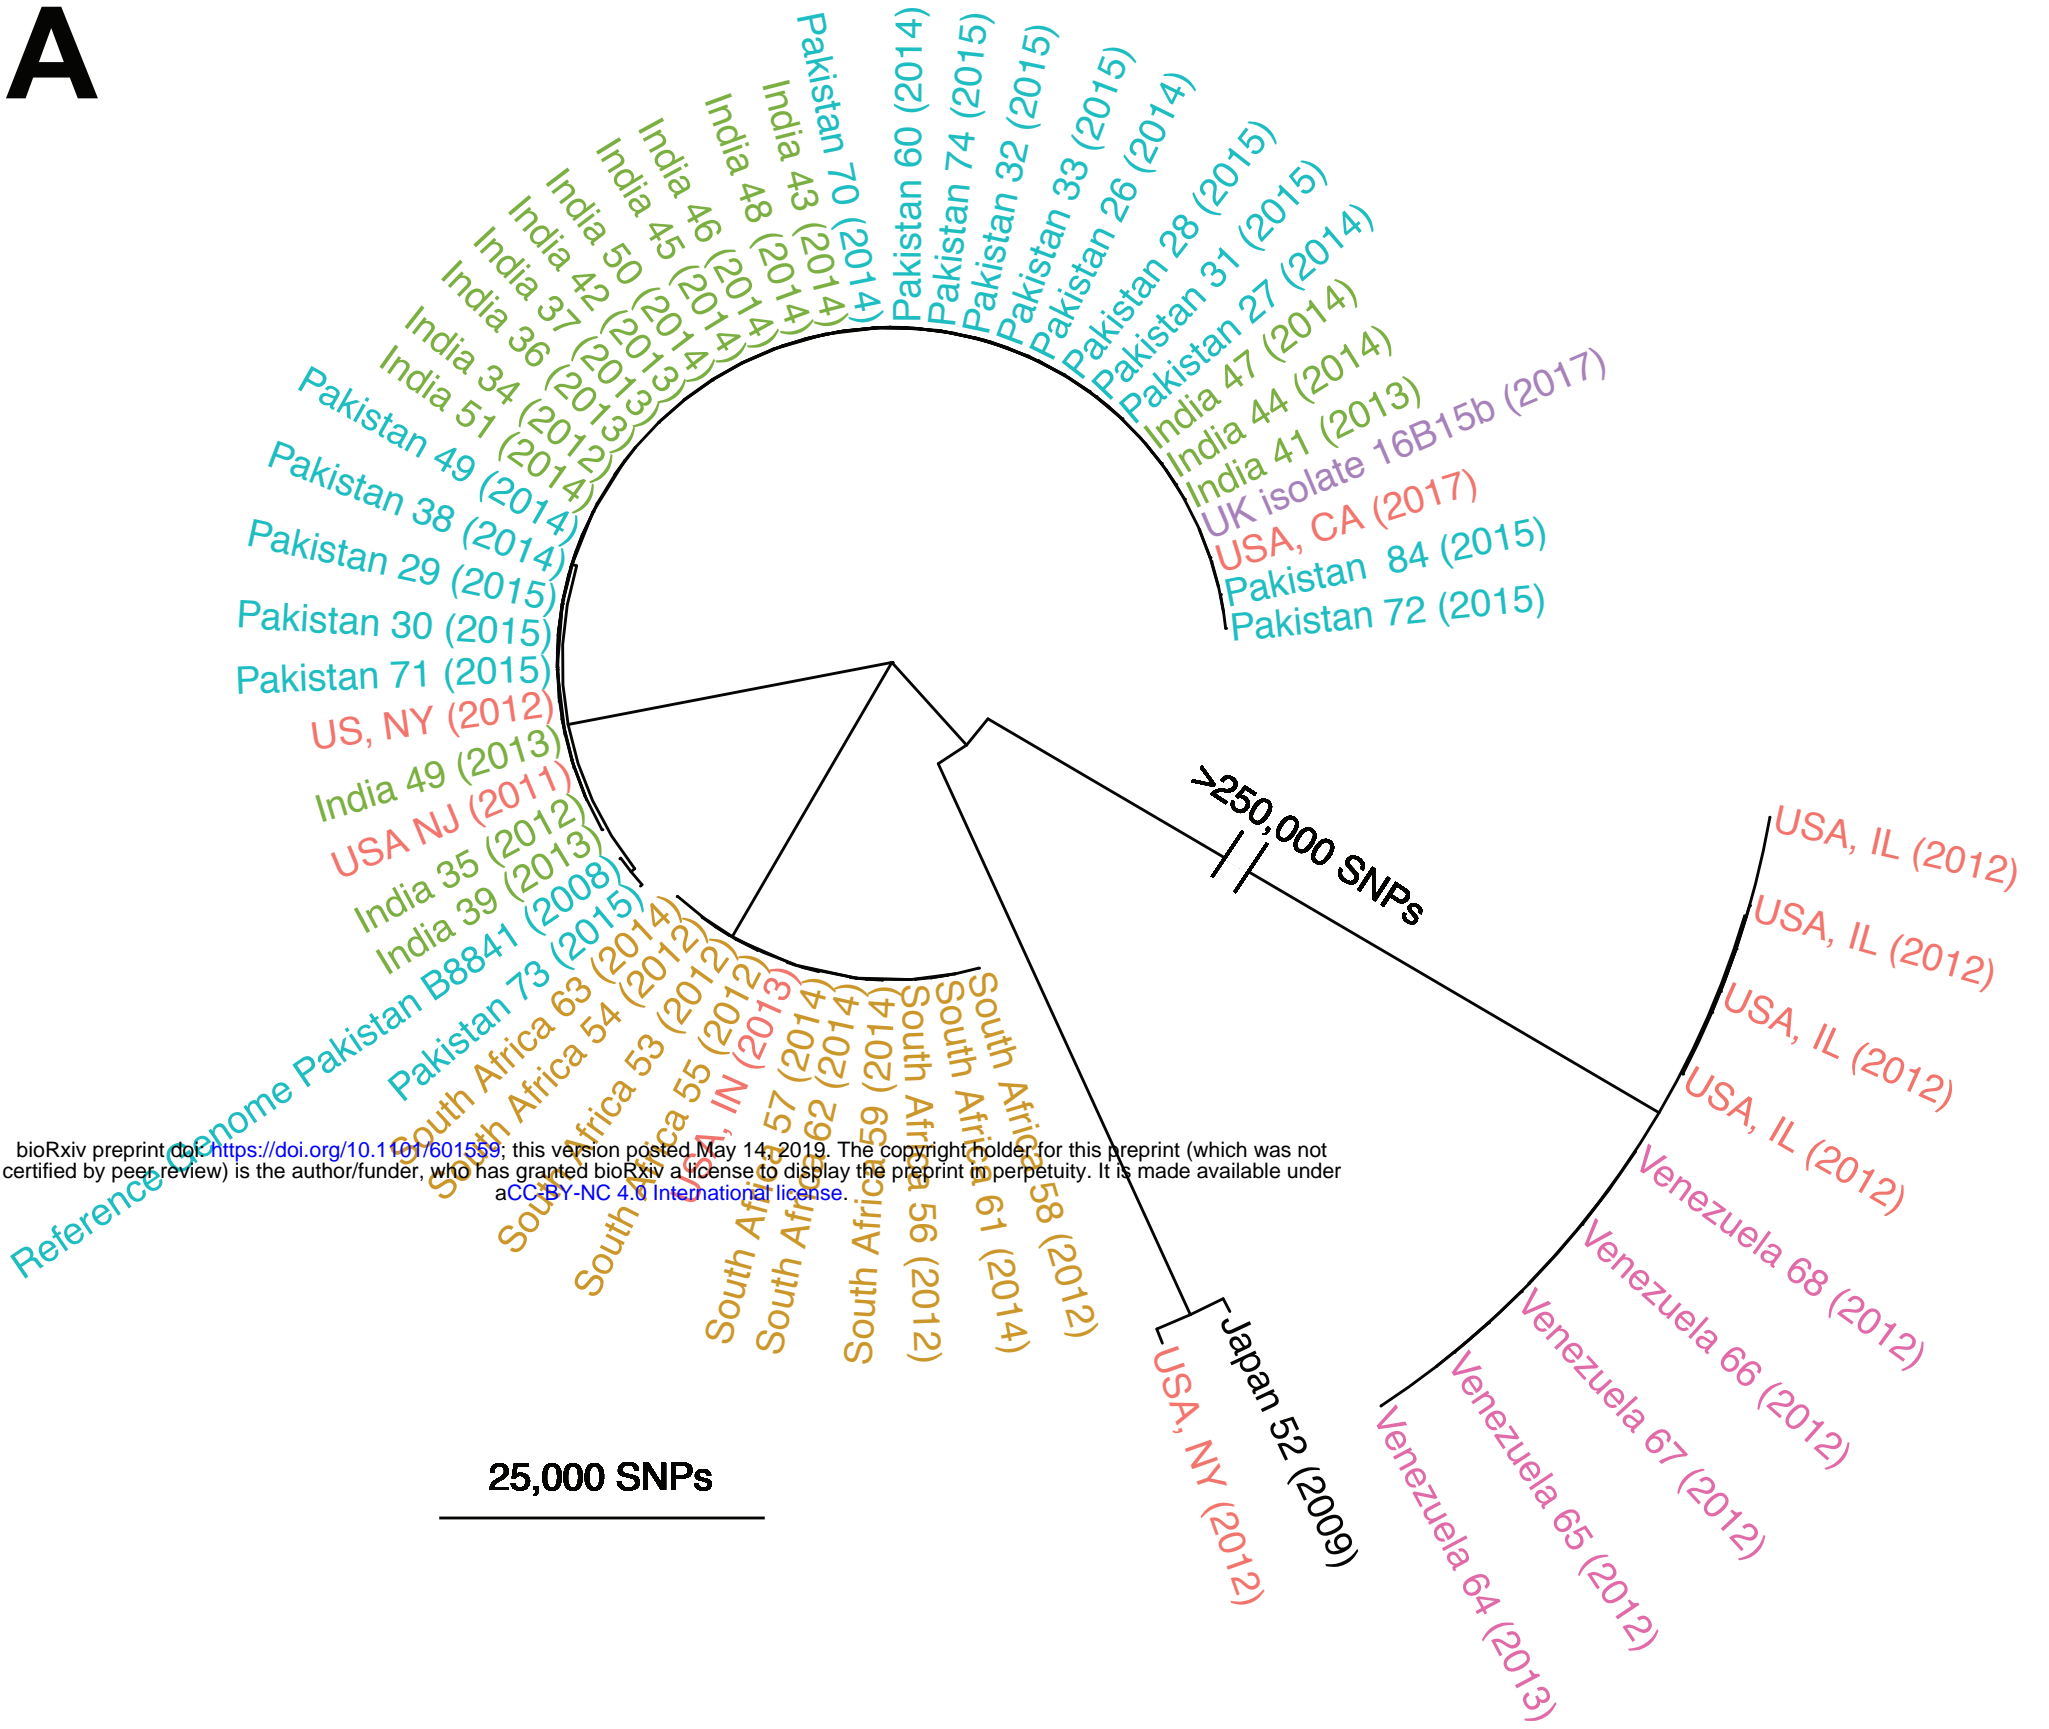

# B

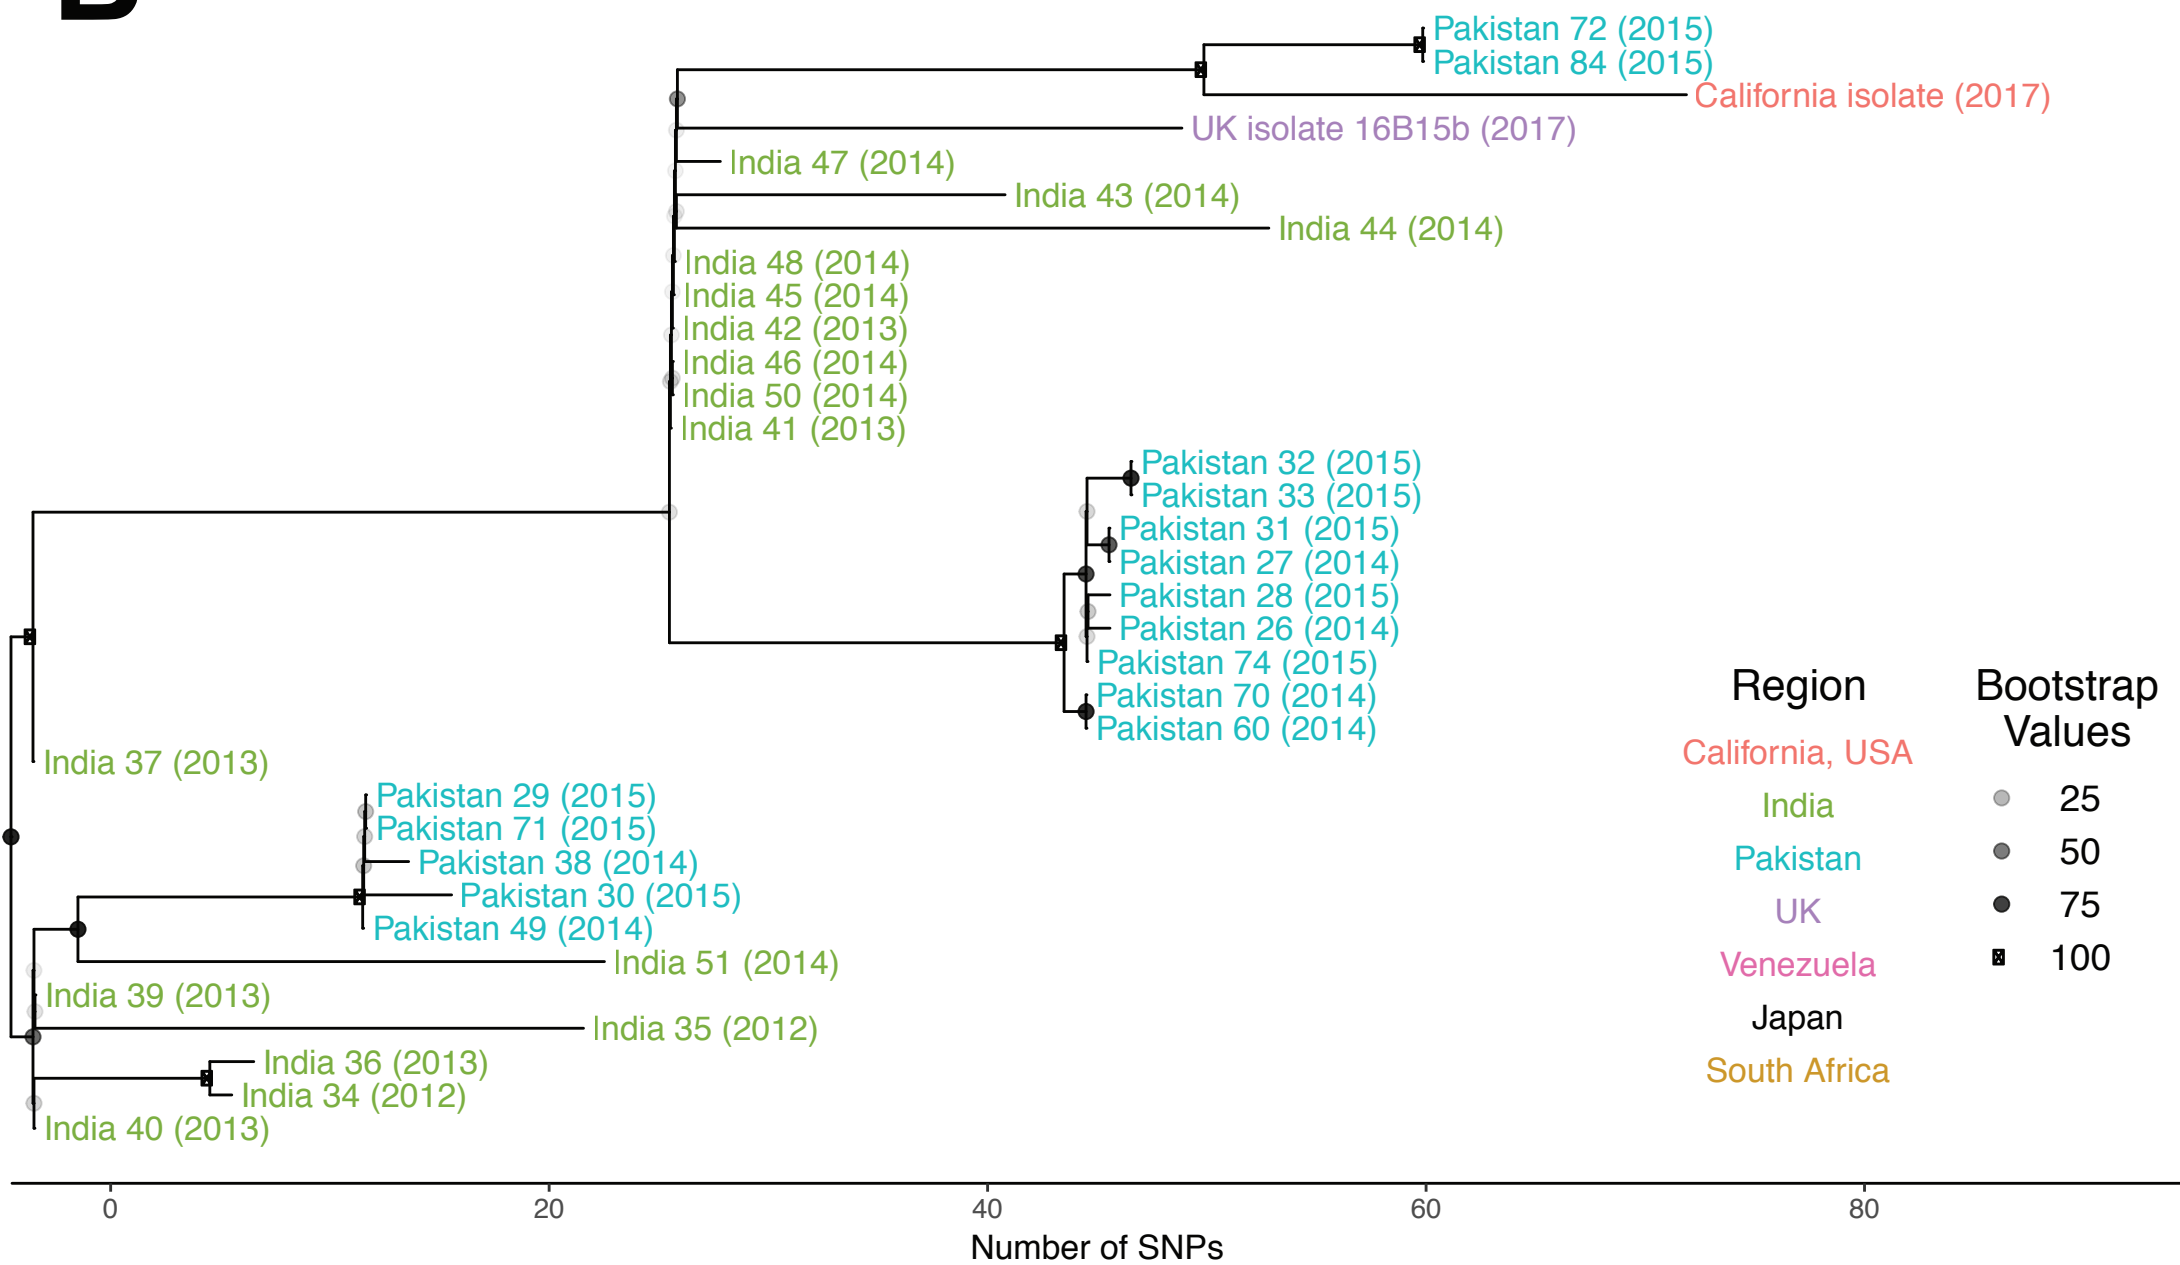

235 **FIGURE LEGEND**

236 A) Phylogenetic assessment based on core genome SNPs demonstrated the four  
237 known geographic clades(1) and placed the California isolate within the South Asia  
238 clade. B) Detailed phylogenetic tree describing the South Asia clade including the  
239 California isolate and UK outbreak isolate16B15b (3), which both harbored the *FKS1*  
240 S639P mutation.
